# Supplementary material for: Constrained inference in sparse coding reproduces contextual effects and predicts laminar neural dynamics
Source: PLoS Comput Biol. 2019 Oct 3;15(10):e1007370. doi: 10.1371/journal.pcbi.1007370 (PMC6793885; doi:10.1371/journal.pcbi.1007370)
Supplement: S1 Text — (PDF) [file pcbi.1007370.s001.pdf]

# S1 Text - Constrained inference in sparse coding reproduces contextual effects and predicts laminar neural dynamics

Federica Capparelli<sup>1\*</sup>, Klaus Pawelzik<sup>1</sup>, Udo Ernst<sup>1</sup>

<sup>1</sup> Institute for Theoretical Physics, University of Bremen, Bremen, Germany

\* federica@neuro.uni-bremen.de

In the following sections we first outline how to extend the generative model to encode an arbitrary number  $P$  of patches and how to formulate it in terms of continuous variables for covering the full visual field and then we briefly report the results obtained performing the contextual-modulation experiments using a different, more general configuration of the visual field.

## Generalization of the model: bigger visual field

The proposed version of the model makes use of a 2-patch visual field, which is the minimal setting to investigate the co-occurrence of features in distant locations of an image. Increasing the size of the visual field is straightforward: it suffices to generalize the expression of the feature representation given by Eq. (2) and (3) (main text) as

$$\mathbf{b}^u = \mathbf{a}^u + \sum_{v=1}^P C^{uv} \mathbf{a}^v \quad (\text{S1})$$

for  $u = 1, \dots, P$ , where  $P$  represents the total number of patches that make up the visual scene. The corresponding equation for generating the image patch  $\mathbf{s}^u$  would still read as

$$\mathbf{s}^u = \Phi \mathbf{b}^u. \quad (\text{S2})$$

Further generalization of the model is possible, going away from discretized partition of the visual field. Denoting by  $\Omega_a, \Omega_b$  and  $\Omega_s$  the spatial domains of the representations in  $\mathbf{a}$  and  $\mathbf{b}$ , and the image, respectively, we could implement a continuous version of the generative model by assuming that a visual image  $s(\mathbf{r})$ , for a particular position  $\mathbf{r} \in \Omega_s$ , is obtained by linear combinations of fundamental features  $\phi_i(\mathbf{r} - \mathbf{r}')$

$$s(\mathbf{r}) = \sum_i \int_{\Omega_b} \phi_i(\mathbf{r} - \mathbf{r}') b_i(\mathbf{r}') d\mathbf{r}' = \int_{\Omega_b} \Phi(\mathbf{r} - \mathbf{r}') \mathbf{b}(\mathbf{r}') d\mathbf{r}'. \quad (\text{S3})$$

where

$$\mathbf{b}(\mathbf{r}) = \int_{\Omega_a} C(\mathbf{r} - \mathbf{r}') \mathbf{a}(\mathbf{r}') d\mathbf{r}'. \quad (\text{S4})$$

To match the hypothesis made in the main text, one should finally assume the following:

- a) Features  $\phi_i$  are localized in visual space and do not extend over a maximum range  $r_{\max}$
- b)  $C$  is intended to capture long-range spatial dependencies extending beyond the range  $r_{\max}$  of elementary features.

## Contextual modulation with a bigger surround

To check how the responses of the model's units changed when using a 'bigger surround', we repeated the simulations of the three paradigms investigated in the main text using a configuration of the visual field with 4 surround-patches instead of only one. Specifically, we consider a visual field composed of five regions, a central patch plus two horizontally and two vertically aligned surround patches, as shown in Fig. S1. For this configuration, the system of differential equations (22) easily extends to

$$\begin{cases} \tau_h \dot{\mathbf{h}}^u = -\mathbf{h}^u + \Phi^\top \mathbf{s}^u - \Phi^\top \Phi \mathbf{b}^u + \mathbf{a}^u \\ \tau_k \dot{\mathbf{k}}^u = -\mathbf{k}^u + \mathbf{a}^u + \sum_{v \in \mathcal{U}(u)} C^{uv} \mathbf{a}^v \end{cases} \quad (\text{S5})$$

where  $\mathcal{U}(u)$  denotes the neighborhood of patch  $u$ , with  $\mathcal{U}(0) = \{1, 2, 3, 4\}$  and  $\mathcal{U}(u) = \{0\}$  for  $u = 1, \dots, 4$ . We find that having four surround patches instead of only one does not increase the contribution of long-range connections and does not affect the agreement between our results and experimental data. The surround modulation curves we obtained are shown in Figs. S2, S3, S4.
